# Supplementary material
Source: PubMed Central journal article supplement (PMC11332067)
Supplement: NIHMS1873682-supplement-Table_S1.pdf [file NIHMS1873682-supplement-Table_S1.pdf]

**Supplemental information**

**Quiescent cancer cells resist T cell attack**

**by forming an immunosuppressive niche**

**Pilar Baldominos, Alex Barbera-Mourelle, Olga Barreiro, Yu Huang, Andrew Wight, Jae-Won Cho, Xi Zhao, Guillem Estivill, Isam Adam, Xavier Sanchez, Shannon McCarthy, Julien Schaller, Zara Khan, Albert Ruzo, Ricardo Pastorello, Edward T. Richardson, Deborah Dillon, Paula Montero-Llopis, Romualdo Barroso-Sousa, Juliet Forman, Sachet A. Shukla, Sara M. Tolaney, Elizabeth A. Mittendorf, Ulrich H. von Andrian, Kai W. Wucherpfennig, Martin Hemberg, and Judith Agudo**

Supplementary Table 1. PADMEseq library preparation information, Related to STAR Methods

| <b>Sample ID</b>   | <b>Library ID</b> | <b>Hashing antibody</b>   | <b>Input cell number</b> |
|--------------------|-------------------|---------------------------|--------------------------|
| Tumor 1 p27K+ area | BRI-703           | Mouse hashing antibody 7  | 7K                       |
| Tumor 1 p27K- area | BRI-703           | Mouse hashing antibody 8  | 7K                       |
| Tumor 2 p27K+ area | BRI-705           | Mouse hashing antibody 9  | 5.6K                     |
| Tumor 2 p27K- area | BRI-705           | Mouse hashing antibody 10 | 7.1K                     |
